# Supplementary material
Source: PubMed Central journal article supplement (PMC3989839)
Supplement: NIHMS570774-supplement-01.pdf [file NIHMS570774-supplement-01.pdf]

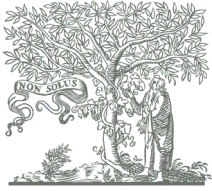

ELSEVIER

## *Neurotoxicology and Teratology*

### Conflict of Interest Policy

Manuscript number (if applicable):  
Article Title: Correspondence of Parent Report and  
Laboratory Measures of Inattention and Hyperactivity  
in Children with Heavy Prenatal Alcohol Exposure

Author name: Sarah N. Mattson, Ph.D.

#### Declarations

*Neurotoxicology and Teratology* requires that all authors sign a declaration of conflicting interests. If you have nothing to declare in any of these categories then this should be stated.

#### Conflict of Interest

A conflicting interest exists when professional judgement concerning a primary interest (such as patient's welfare or the validity of research) may be influenced by a secondary interest (such as financial gain or personal rivalry). It may arise for the authors when they have financial interest that may influence their interpretation of their results or those of others. Examples of potential conflicts of interest include employment, consultancies, stock ownership, honoraria, paid expert testimony, patent applications/registrations, and grants or other funding.

#### Please state any competing interests

#### Funding Source

All sources of funding should also be acknowledged and you should declare any involvement of study sponsors in the study design; collection, analysis and interpretation of data; the writing of the manuscript; the decision to submit the manuscript for publication. If the study sponsors had no such involvement, this should be stated.

#### Please state any sources of funding for your research

Research described in this paper was supported by National Institute on Alcohol Abuse and Alcoholism (NIAAA) grant numbers U01 AA014834 (Mattson), U24 AA014811 (Riley), U24 AA014818 (Barnett), U24 AA014815 (Jones), T32 AA013525 (Riley), and F31 AA022261 (Glass).

**Signature** (a scanned signature is acceptable, but each author must sign)

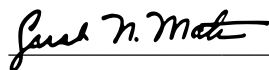

**Print name**

Sarah N. Mattson, Ph.D.

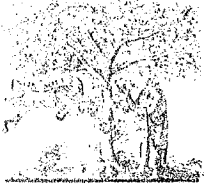

***Neurotoxicology and Teratology***  
**Conflict of Interest Policy**

Manuscript number (if applicable):  
Article Title: Correspondence of Parent Report and  
Laboratory Measures of Inattention and Hyperactivity  
in Children with Heavy Prenatal Alcohol Exposure

Author name: Leila Glass, M.S.

**Declarations**

*Neurotoxicology and Teratology* requires that all authors sign a declaration of conflicting interests. If you have nothing to declare in any of these categories then this should be stated.

**Conflict of Interest**

A conflicting interest exists when professional judgement concerning a primary interest (such as patient's welfare or the validity of research) may be influenced by a secondary interest (such as financial gain or personal rivalry). It may arise for the authors when they have financial interest that may influence their interpretation of their results or those of others. Examples of potential conflicts of interest include employment, consultancies, stock ownership, honoraria, paid expert testimony, patent applications/registrations, and grants or other funding.

**Please state any competing interests**

N/A, none

**Funding Source**

All sources of funding should also be acknowledged and you should declare any involvement of study sponsors in the study design; collection, analysis and interpretation of data; the writing of the manuscript; the decision to submit the manuscript for publication. If the study sponsors had no such involvement, this should be stated.

**Please state any sources of funding for your research**

NIAAA T32 AA013525  
NIAAA F31 AA022261

**Signature** (a scanned signature is acceptable,  
but each author must sign)

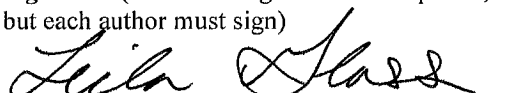

**Print name**

LEILA GLASS

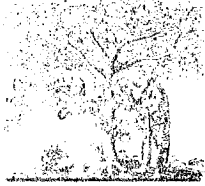

## *Neurotoxicology and Teratology* Conflict of Interest Policy

Manuscript number (if applicable):  
Article Title: Correspondence of Parent Report and  
Laboratory Measures of Inattention and Hyperactivity  
in Children with Heavy Prenatal Alcohol Exposure

Author name: Edward P. Riley, Ph.D.

### Declarations

*Neurotoxicology and Teratology* requires that all authors sign a declaration of conflicting interests. If you have nothing to declare in any of these categories then this should be stated.

#### Conflict of Interest

A conflicting interest exists when professional judgement concerning a primary interest (such as patient's welfare or the validity of research) may be influenced by a secondary interest (such as financial gain or personal rivalry). It may arise for the authors when they have financial interest that may influence their interpretation of their results or those of others. Examples of potential conflicts of interest include employment, consultancies, stock ownership, honoraria, paid expert testimony, patent applications/registrations, and grants or other funding.

Please state any competing interests

None

#### Funding Source

All sources of funding should also be acknowledged and you should declare any involvement of study sponsors in the study design; collection, analysis and interpretation of data; the writing of the manuscript; the decision to submit the manuscript for publication. If the study sponsors had no such involvement, this should be stated.

Please state any sources of funding for your research

T32AA013525  
(NIAAA)

Signature (a scanned signature is acceptable,  
but each author must sign)

Print name

EDWARD P. RILEY

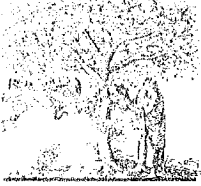

***Neurotoxicology and Teratology***  
**Conflict of Interest Policy**

Manuscript number (if applicable):  
Article Title: Correspondence of Parent Report and  
Laboratory Measures of Inattention and Hyperactivity  
in Children with Heavy Prenatal Alcohol Exposure

Author name: Benjamin N. Deweese

**Declarations**

*Neurotoxicology and Teratology* requires that all authors sign a declaration of conflicting interests. If you have nothing to declare in any of these categories then this should be stated.

**Conflict of Interest**

A conflicting interest exists when professional judgement concerning a primary interest (such as patient's welfare or the validity of research) may be influenced by a secondary interest (such as financial gain or personal rivalry). It may arise for the authors when they have financial interest that may influence their interpretation of their results or those of others. Examples of potential conflicts of interest include employment, consultancies, stock ownership, honoraria, paid expert testimony, patent applications/registrations, and grants or other funding.

**Please state any competing interests**

N/A

**Funding Source**

All sources of funding should also be acknowledged and you should declare any involvement of study sponsors in the study design; collection, analysis and interpretation of data; the writing of the manuscript; the decision to submit the manuscript for publication. If the study sponsors had no such involvement, this should be stated.

**Please state any sources of funding for your research**

N/A

**Signature** (a scanned signature is acceptable, but each author must sign)

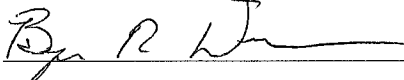

**Print name**

Benjamin N Deweese

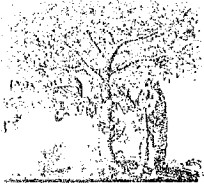

***Neurotoxicology and Teratology***  
**Conflict of Interest Policy**

Manuscript number (if applicable):  
Article Title: Correspondence of Parent Report and  
Laboratory Measures of Inattention and Hyperactivity  
in Children with Heavy Prenatal Alcohol Exposure

Author name: Diana Graham, M.A.

**Declarations**

*Neurotoxicology and Teratology* requires that all authors sign a declaration of conflicting interests. If you have nothing to declare in any of these categories then this should be stated.

**Conflict of Interest**

A conflicting interest exists when professional judgement concerning a primary interest (such as patient's welfare or the validity of research) may be influenced by a secondary interest (such as financial gain or personal rivalry). It may arise for the authors when they have financial interest that may influence their interpretation of their results or those of others. Examples of potential conflicts of interest include employment, consultancies, stock ownership, honoraria, paid expert testimony, patent applications/registrations, and grants or other funding.

**Please state any competing interests**

N/A

**Funding Source**

All sources of funding should also be acknowledged and you should declare any involvement of study sponsors in the study design; collection, analysis and interpretation of data; the writing of the manuscript; the decision to submit the manuscript for publication. If the study sponsors had no such involvement, this should be stated.

**Please state any sources of funding for your research**

N/A

**Signature** (a scanned signature is acceptable,  
but each author must sign)

**Print name**

Diana Graham

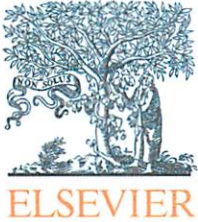

*Neurotoxicology and Teratology*  
Conflict of Interest Policy

Manuscript number (if applicable):  
Article Title: Correspondence of Parent Report and  
Laboratory Measures of Inattention and Hyperactivity  
in Children with Heavy Prenatal Alcohol Exposure

Author name: Sarah N. Mattson, Ph.D.

**Declarations**

*Neurotoxicology and Teratology* requires that all authors sign a declaration of conflicting interests. If you have nothing to declare in any of these categories then this should be stated.

**Conflict of Interest**

A conflicting interest exists when professional judgement concerning a primary interest (such as patient's welfare or the validity of research) may be influenced by a secondary interest (such as financial gain or personal rivalry). It may arise for the authors when they have financial interest that may influence their interpretation of their results or those of others. Examples of potential conflicts of interest include employment, consultancies, stock ownership, honoraria, paid expert testimony, patent applications/registrations, and grants or other funding.

**Please state any competing interests**

**Funding Source**

All sources of funding should also be acknowledged and you should declare any involvement of study sponsors in the study design; collection, analysis and interpretation of data; the writing of the manuscript; the decision to submit the manuscript for publication. If the study sponsors had no such involvement, this should be stated.

**Please state any sources of funding for your research**

See Attached List.

**Signature** (a scanned signature is acceptable, but each author must sign)

**Print name**

Kenneth Lyons Jones

## Dept of Pediatrics : UCSD Business Affiliations

---

| <b>Company/Organization</b>     | <b>Period</b>         | <b>Relationship</b> |  |
|---------------------------------|-----------------------|---------------------|--|
| Abbot Laboratories              | 12/1/2003-8/12/2015   | Research Contract   |  |
| Immunex Corp, Amgen Inc.        | 3/1/2005-11/19/2014   | Research Contract   |  |
| Apotex, Inc., Barr Laboratories | 7/18/2005-7/31/2014   | Research Contract   |  |
| Bristol Myers/Squibb            | 11/1/2006-12/01/2014  | Research Contract   |  |
| Glaxo Smith Kline               | 4/15/2011-4/14/2013   | Research Contract   |  |
| Novartis                        | 8/12/2010-11/01/2013  | Research Contract   |  |
| Hoffman La Roche<br>Genetech    | 11/01/2010-10/31/2015 | Research Contract   |  |
| UCB Pharma                      | 2/13/2012-2/12/2017   | Research Contract   |  |
| Genzyme (Sanofi-Aventis)        | 10/25/2011-12/31/2017 | Research Contract   |  |
| Janssen Biotech, Inc            | 06/01/2013-12/31/2020 | Research Contract   |  |
| Pfizer                          | 06/13/2013-06/16/2018 | Research Contract   |  |
